# Supplementary material
Source: Research Square preprint supplement (doi:10.21203/rs.3.rs-8752115/v1)
Supplement: Supplementary file 1 [file cce862e978ea9b3b180767d3.docx]

Table 1. Baseline characteristics of patients undergoing coronary computed tomography

| Variable |  |
| --- | --- |
| Demographic characteristics  Age (years)  Male % | 59  92.0 |
| Cardiovascular risk factors  Hypertension % Type 2 diabetes mellitus % Dyslipidemia at baseline % Current smoking % | 40.0  28.0  80.0  40.0 |
| Lipid profile at baseline  Total cholesterol mg/dl LDL cholesterol mg/dl HDL cholesterol mg/dl | 177 (161-216)  121 (99-133)  50 (41-60) |
| HIV-related characteristics  CD4 cell count at baseline, cells/ µL  Antiretroviral therapy regimen at baseline  INSTI-based %  PI-based % | 463 (355-674)  64.0  20.0 |
| Cardiovascular risk scores  Framingham risk score  SCORE2  REGICOR D:A:D reduced  D:A:D extended | 21.1 (16.2-28.6)  7.0 (4.4-9.0)  5.0 (3.0-6.0)  10.2 (6.6-15.6)  8.1 (5.8-14.7) |
| Continuous variables are expressed as median (interquartile range), and categorical variables as number (percentage). Cardiovascular risk scores are expressed as estimated percentage risk. INSTI, integrase strand transfer inhibitor; PI, protease inhibitor | |

Table 2: Distribution of cardiovascular risk estimates by risk score.

| **Score** | **Median** | **Q1** | **Q3** |
| --- | --- | --- | --- |
| Framingham | 21.10 | 16.20 | 28.60 |
| REGICOR | 5.00 | 3.75 | 6.25 |
| SCORE2 | 6.70 | 4.70 | 08.05 |
| D:A:D reduced | 9.32 | 6.63 | 15.10 |
| D:A:D | 08.07 | 5.76 | 14.67 |

Q1: 25th percentile, lower quartile

Q3: 75th percentile, upper quartile

Table 3: Comparison of cardiovascular risk scores between patients with CAC ≤100 and CAC >100

| **Score** | **Test** | **Statistic** | **p-value** | **Median CAC ≤100** | **Median CAC >100** |
| --- | --- | --- | --- | --- | --- |
| Framingham | Welch’s t-test | 2.265 | 0.04 | 18.3 | 33.4 |
| REGICOR | Welch’s t-test | 826 | 0.42 | 4.0 | 6.0 |
| SCORE2 | Welch’s t-test | 1.598 | 0.16 | 6.25 | 8.0 |
| D:A:D reduced | Welch’s t-test | 1.784 | 0.15 | 8.16 | 17.48 |
| D:A:D | Welch’s t-test | 1.100 | 0.38 | 7.3 | 15.56 |

CAC: coronary artery calcium

Table 4:Discriminative performance of cardiovascular risk scores for predicting CAC >100.

| **SCORE2** | **AUC** | **IC 95%** | **p** |
| --- | --- | --- | --- |
| Framingham | 0.78 | 0.55 – 1.00 | 0.06 |
| REGICOR | 0.63 | 0.37 – 0.88 | 0.40 |
| SCORE2 | 0.73 | 0.46 – 1.00 | 0.15 |
| Reduced D:A:D | 0.77 | 0.47 – 1.00 | 0.17 |
| D:A:D | 0.71 | 0.33 – 1.00 | 0.30 |

CI: confidence interval

AUC: area under the curve
